# Supplementary material for: Anomalous structural dynamics of minimally frustrated residues in cardiac troponin C triggers hypertrophic cardiomyopathy
Source: PubMed Central journal article supplement (PMC8171346; doi:10.1039/d1sc01886h), 2021-04-29

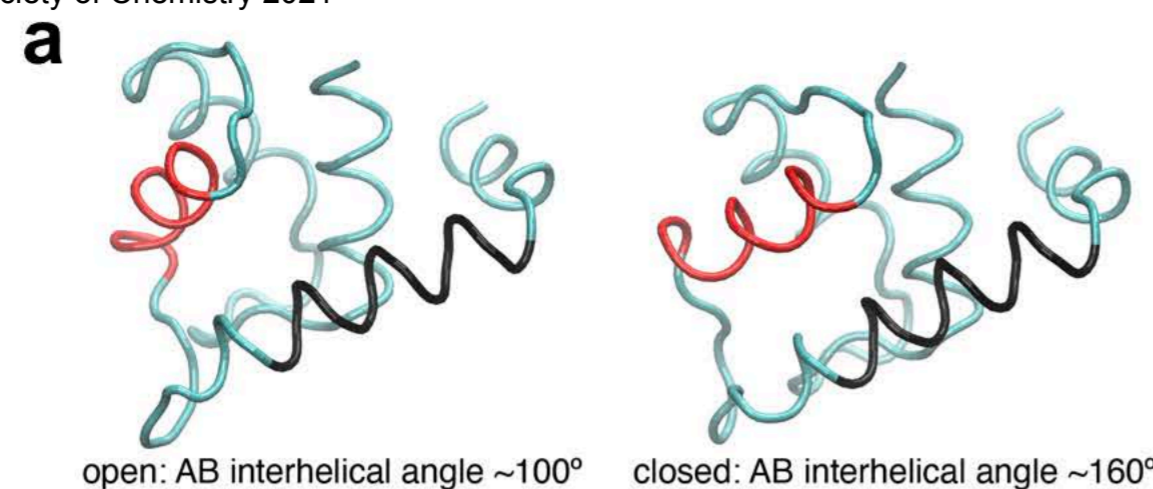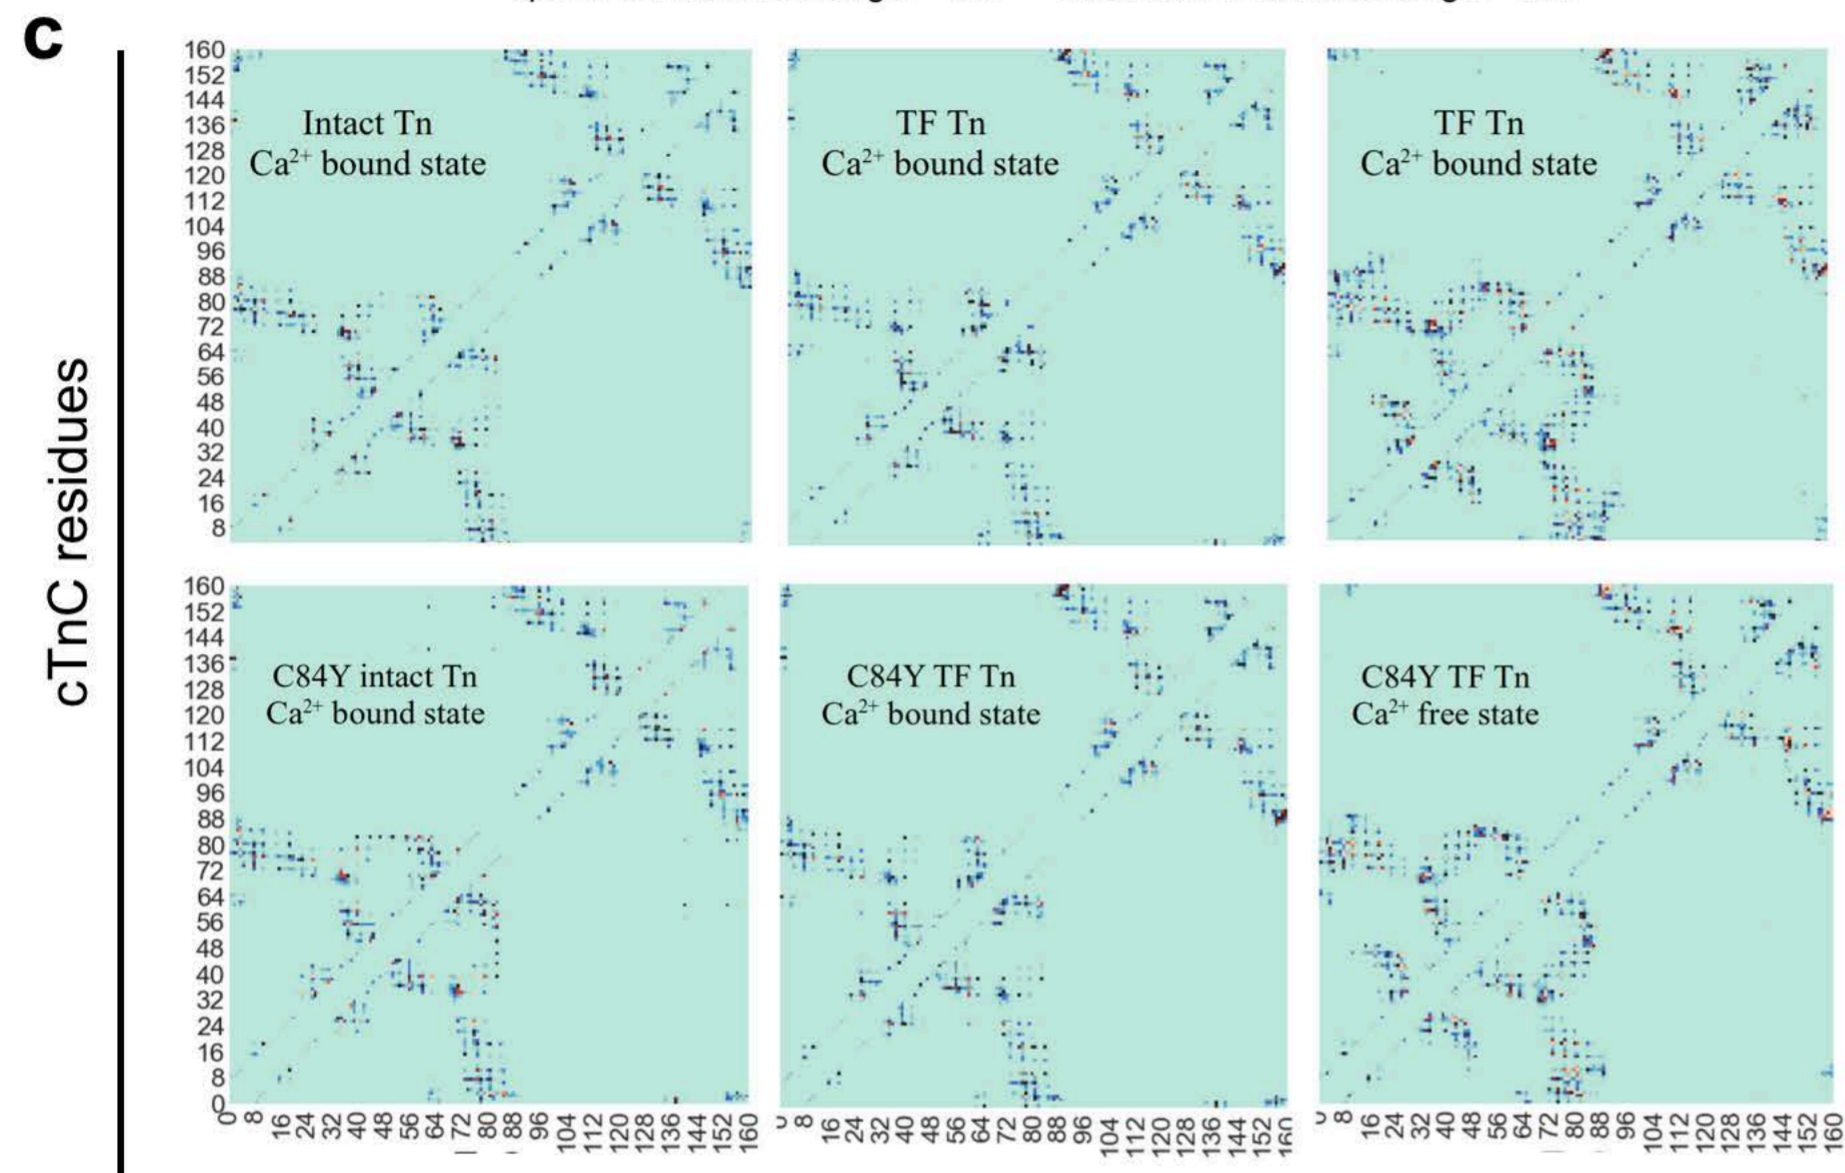

cTnC residues

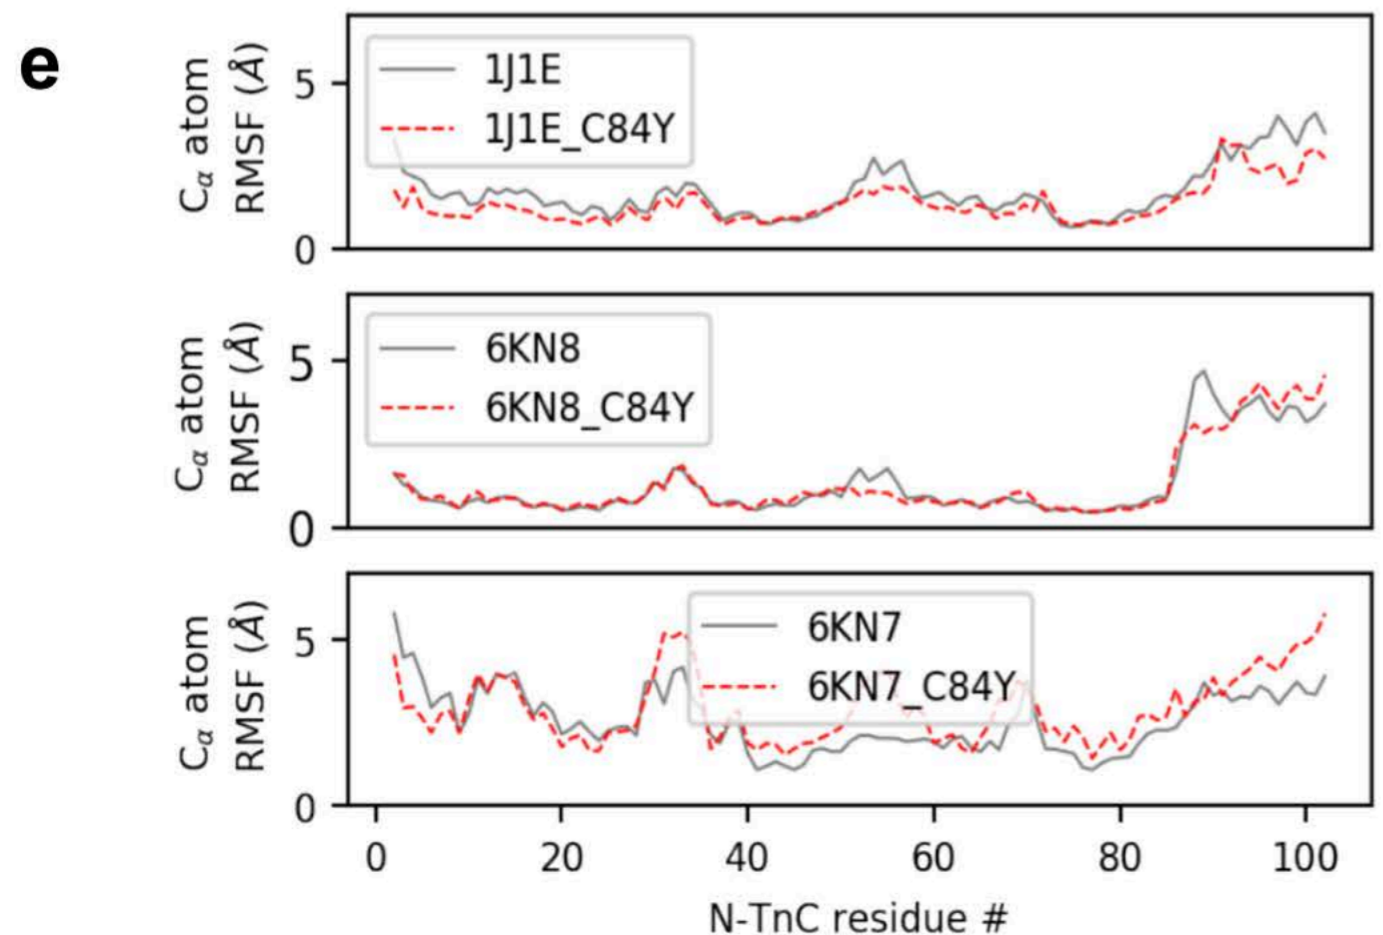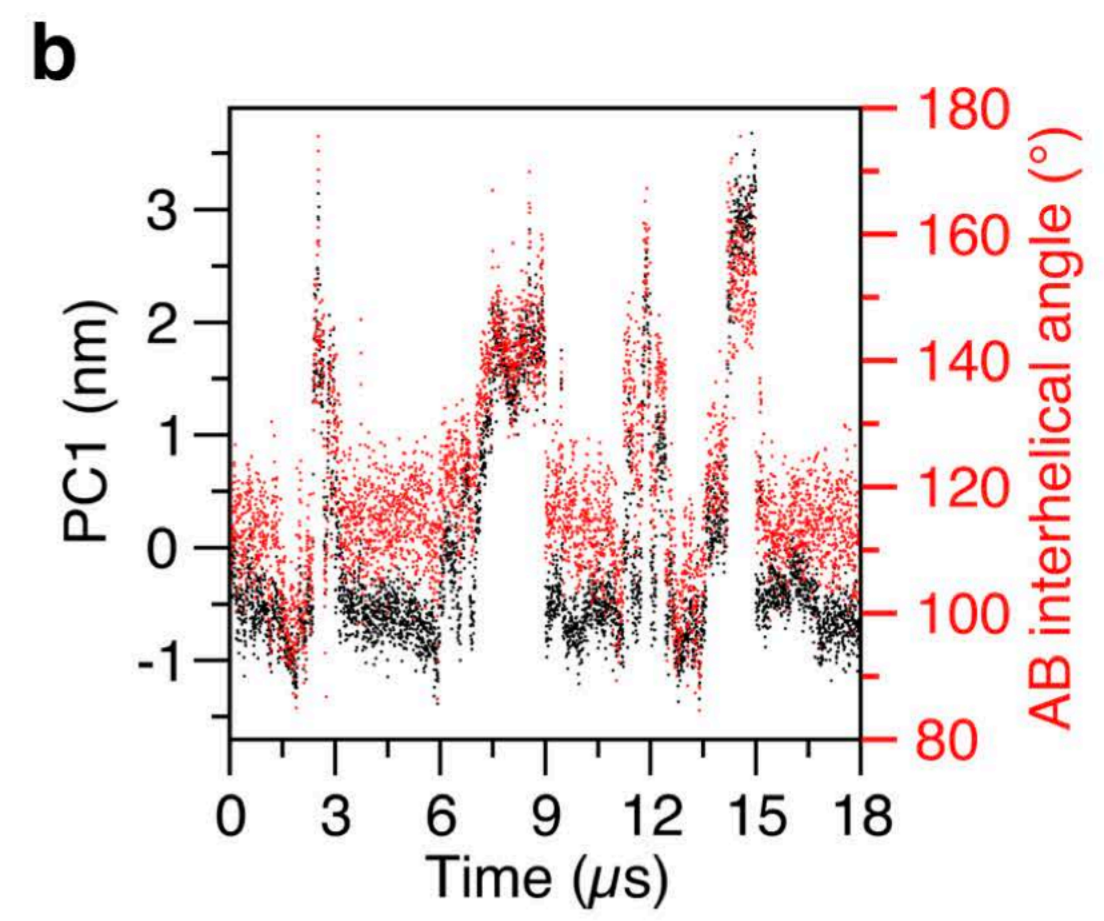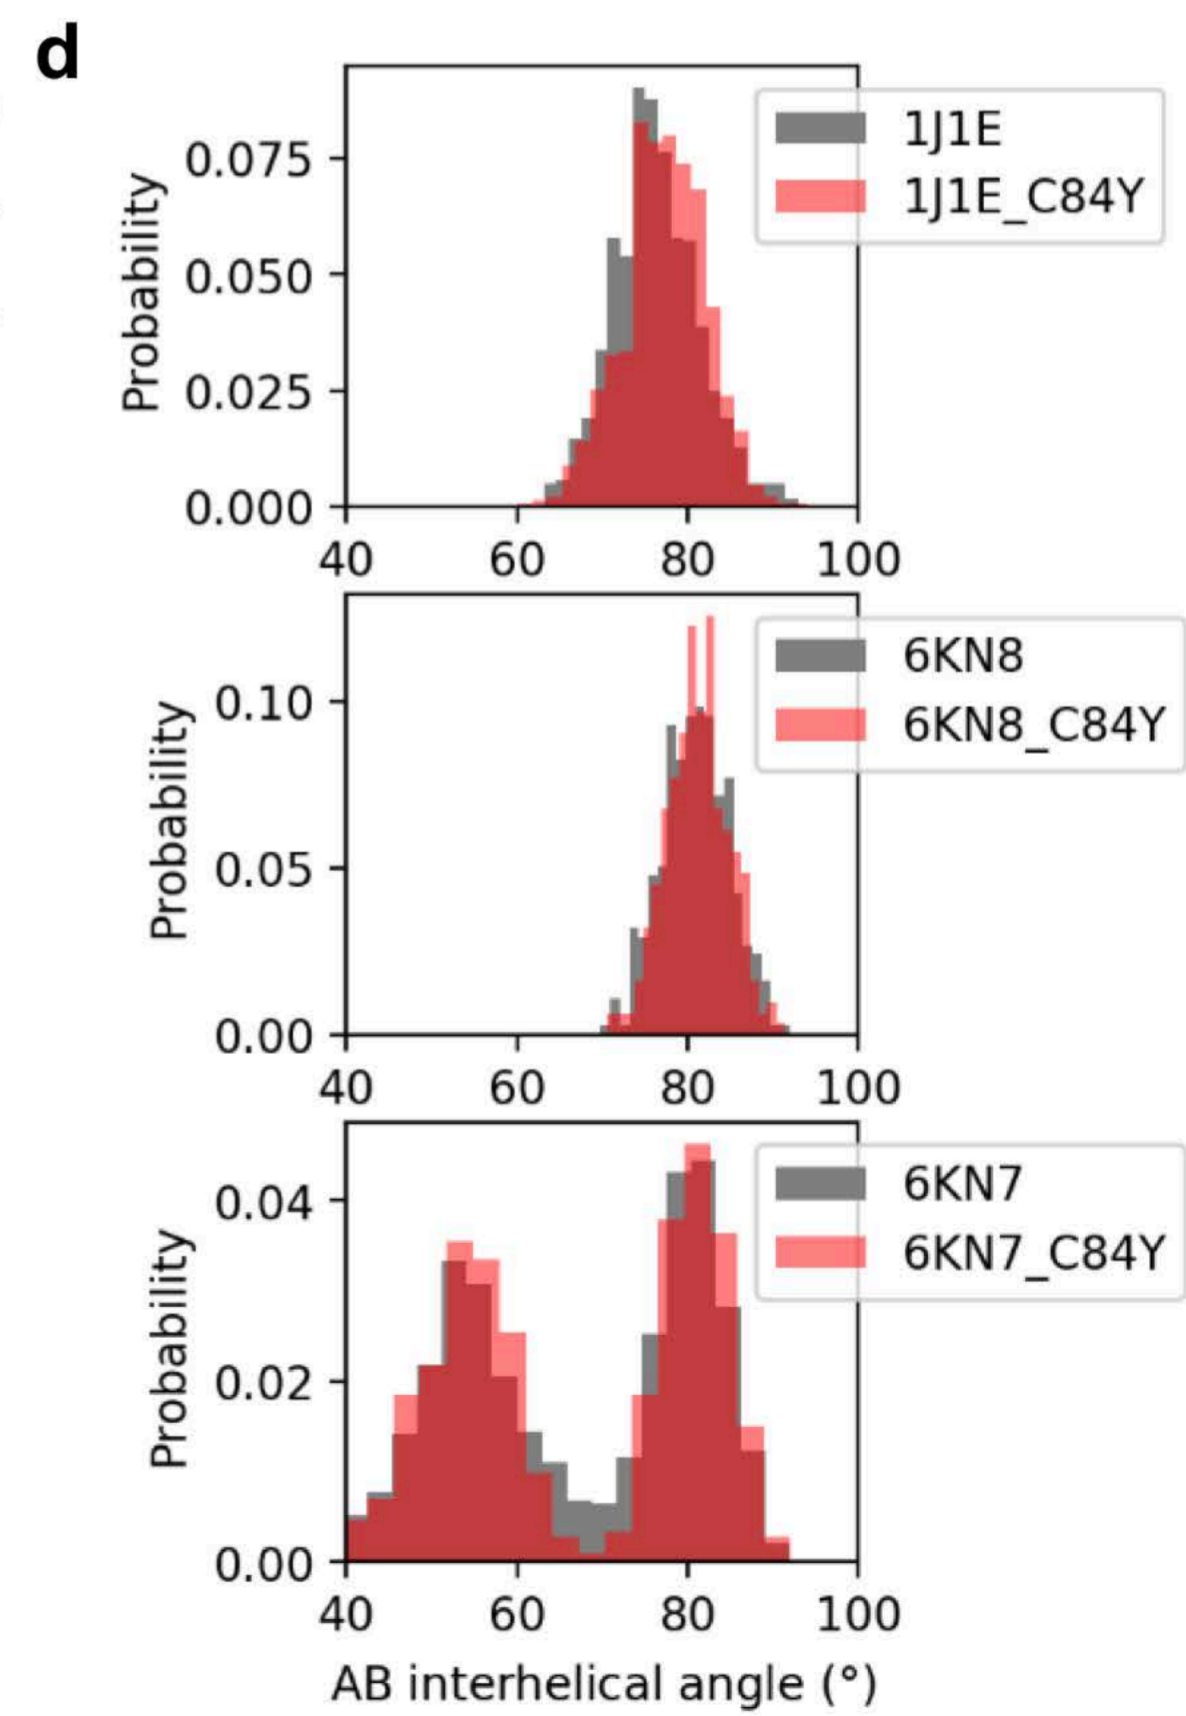

Supplement: SC-012-D1SC01886H-s004.pdf [file SC-012-D1SC01886H-s004.pdf]
