# Supplementary material for: Anomalous structural dynamics of minimally frustrated residues in cardiac troponin C triggers hypertrophic cardiomyopathy
Source: Chem Sci. 2021 Apr 29;12(21):7308–23. doi: 10.1039/d1sc01886h (PMC8171346; doi:10.1039/d1sc01886h)
Supplement: SC-012-D1SC01886H-s008 [file SC-012-D1SC01886H-s008.pdf]

**Supplementary Table 1:** Echocardiographic parameter of *Tnnc1*<sup>WT/WT</sup> (WT) and *Tnnc1*<sup>WT/C84Y</sup> (C84Y) knock-in mice.

| <b>Echo<br/>Parameter</b>     | <b>3 months</b>  |                   | <b>6 months</b> |                   |
|-------------------------------|------------------|-------------------|-----------------|-------------------|
|                               | <b>WT (n=5)</b>  | <b>C84Y (n=7)</b> | <b>WT (n=5)</b> | <b>C84Y (n=6)</b> |
| <b>Male</b>                   | <b>2</b>         | <b>4</b>          | <b>2</b>        | <b>4</b>          |
| <b>Female</b>                 | <b>3</b>         | <b>3</b>          | <b>3</b>        | <b>2</b>          |
| AET (ms)                      | 44.4±0.6         | 51.1±2.9          | 46.4±2.0        | 51.6±1.8          |
| IVCT (ms)                     | 13.9±1.8         | 28.1±3.7*         | 20.4±2.1        | 20.1±4.0          |
| IVRT (ms)                     | 21.0±2.4         | 25.0±4.0          | 15.0±2.4        | 22.5±1.1*         |
| MV A (mm/s)                   | 492.6±27.2       | 562.2±50.5        | 482.3±32.7      | 523.1±39.8        |
|                               |                  | -                 | -               | -                 |
| MV Decel (mm/s <sup>2</sup> ) | -95574.3±22164.7 | 61082.1±9733.3    | 75645.5±19507.7 | 73708.8±28032.0   |
| MV Decel (ms)                 | 9.9±2.3          | 12.3±1.8          | 10.9±2.3        | 13.0±2.8          |
| MV PHT (ms)                   | 10.6±0.8         | 10.3±1.0          | 10.1±0.8        | 11.5±0.9          |
| NFT (ms)                      | 79.2±1.4         | 103.7±5.1*        | 81.9±3.2        | 94.4±4.2          |
| MV E/A                        | 1.5±0.0          | 1.1±0.1*          | 1.4±0.1         | 1.2±0.1           |
| Heart Rate (BPM)              | 504.0±7.4        | 450.0±11.6*       | 500.9±4.7       | 451.6±12.7*       |
| LVAW;d (mm)                   | 1.2±0.1          | 1.3±0.1           | 1.1±0.0         | 1.3±0.1           |
| LVAW;s (mm)                   | 1.5±0.1          | 1.6±0.1           | 1.5±0.1         | 1.7±0.1           |
| LVPW;d (mm)                   | 1.0±0.1          | 1.0±0.1           | 0.8±0.1         | 1.2±0.1*          |
| LVPW;s (mm)                   | 1.2±0.1          | 1.3±0.0           | 1.1±0.1         | 1.5±0.0*          |
| CO (mL/min)                   | 20.1±1.7         | 13.6±1.5*         | 22.4±1.9        | 15.3±1.0*         |
| Diameter;d (mm)               | 4.2±0.1          | 3.6±0.2*          | 4.2±0.1         | 3.7±0.1*          |
| Diameter;s (mm)               | 3.2±0.1          | 2.6±0.2           | 3.0±0.1         | 2.6±0.2           |
| EF (%)                        | 49.9±3.3         | 56.8±5.1          | 56.1±4.1        | 58.7±4.1          |
| FS (%)                        | 25.2±2.0         | 29.9±3.7          | 29.3±2.6        | 30.8±2.9          |
| LV Mass Corr (mg)             | 157.8±10.5       | 134.1±10.7        | 131.3±10.2      | 158.7±14.4        |
| SV (uL)                       | 39.9±3.4         | 30.9±2.8          | 45.0±3.7        | 34.0±2.1*         |
| V;d (uL)                      | 79.9±5.0         | 56.6±6.6*         | 80.3±3.1        | 58.7±4.1*         |
| V;s (uL)                      | 40.0±3.5         | 25.6±5.4          | 35.3±3.8        | 24.8±3.3          |
