# Supplementary material for: Anomalous structural dynamics of minimally frustrated residues in cardiac troponin C triggers hypertrophic cardiomyopathy
Source: Chem Sci. 2021 Apr 29;12(21):7308–23. doi: 10.1039/d1sc01886h (PMC8171346; doi:10.1039/d1sc01886h)
Supplement: SC-012-D1SC01886H-s009 [file SC-012-D1SC01886H-s009.pdf]

**Supplementary Table 2.** Values of Contractile Parameters Exhibited by *Tnncl*<sup>WT/WT</sup> (WT) and *Tnncl*<sup>WT/C84Y</sup> (C84Y) CMPs.

|                                                | WT           | C84Y          |
|------------------------------------------------|--------------|---------------|
| <b>F<sub>max</sub> (mN/mm<sup>2</sup>)</b>     | 42.86 ± 7.30 | 40.00 ± 8.70  |
| <b>F<sub>passive</sub> (mN/mm<sup>2</sup>)</b> | 01.08 ± 0.27 | 00.53 ± 0.22  |
| <b>pCa<sub>50</sub></b>                        | 05.56 ± 0.02 | 05.72 ± 0.02* |
| <b>n<sub>Hill</sub></b>                        | 02.19 ± 0.22 | 02.16 ± 0.12  |
| <b>k<sub>TR max</sub> (s<sup>-1</sup>)</b>     | 20.10 ± 2.22 | 23.14 ± 3.86  |
| <b>SS<sub>max</sub> (MPa)</b>                  | 01.33 ± 0.25 | 01.15 ± 0.21  |
| <b>SS<sub>pCa50</sub></b>                      | 05.65 ± 0.04 | 05.83 ± 0.03* |
| <b>SSn<sub>Hill</sub></b>                      | 02.34 ± 0.24 | 03.32 ± 0.80  |
| <b>#CMP</b>                                    | 6            | 5             |

\*p=0.001 from unpaired t-test comparing C84Y pCa<sub>50</sub> vs. WT pCa<sub>50</sub>.

\*p=0.019 from unpaired t-test comparing C84Y SS<sub>pCa50</sub> vs. WT SS<sub>pCa50</sub>.

**Supplementary Table 3.** Optimized parameter estimates and predictions from the 3-state model for force-*k*<sub>TR</sub> data depicted in Figure 6.

| Reconstituted<br>CMP | 3-state model fitted parameters |                             |                                                          |                                           | 3-state model predictions |                     |                                              |
|----------------------|---------------------------------|-----------------------------|----------------------------------------------------------|-------------------------------------------|---------------------------|---------------------|----------------------------------------------|
|                      | <i>f</i> (s <sup>-1</sup> )     | <i>g</i> (s <sup>-1</sup> ) | <i>k<sub>ON</sub></i> (M <sup>-1</sup> s <sup>-1</sup> ) | <i>k<sub>OFF</sub></i> (s <sup>-1</sup> ) | pCa <sub>50</sub>         | max force<br>(norm) | <i>k<sub>TR max</sub></i> (s <sup>-1</sup> ) |
| WT                   | 8.19                            | 12.39                       | 1.84 x 10 <sup>8</sup>                                   | 890.67                                    | 5.56                      | 1.00                | 20.10                                        |
| C84Y                 | 26.54                           | 5.76                        | 1.34 x 10 <sup>8</sup>                                   | 2040.96                                   | 5.72                      | 0.93                | 23.14                                        |
