# Supplementary material for: Anomalous structural dynamics of minimally frustrated residues in cardiac troponin C triggers hypertrophic cardiomyopathy
Source: Chem Sci. 2021 Apr 29;12(21):7308–23. doi: 10.1039/d1sc01886h (PMC8171346; doi:10.1039/d1sc01886h)
Supplement: SC-012-D1SC01886H-s011 [file SC-012-D1SC01886H-s011.xlsx]

## Sheet: Fig2 b
Residue	CSP
	ppm
C84Y
1
2
3	0.00946
4	0.03983
5	0.13364
6	0.10265
7	0.01105
8	0.05084
9	0.1398
10	0.04968
11	0.01922
12	0.01805
13	0.03014
14	0.0171
15	0.04153
16	0.03107
17
18	0.05219
19	0.02409
20
21
22
23
24
25	0.033
26	0.03111
27
28
29	0.07749
30	0.00175
31	0.0177
32	0.00996
33	0.01886
34	0.00398
35	0.02024
36
37
38
39
40	0.07241
41	--
42	0.01252
43	0.01576
44	0.0305
45	0.07434
46	0.02625
47	0.00938
48	0.0282
49	0.02151
50	0.0328
51	0.02879
52	--
53	0.0313
54	--
55	0.02277
56	0.01986
57	--
58	--
59	--
60	--
61	--
62	--
63	--
64	--
65	0.04749
66	0.06721
67	0.02683
68	0.02023
69	0.03958
70	0.04816
71	0.02114
72	0.14862
73	0.08036
74	0.00749
75	--
76	--
77	0.01279
78	0.0451
79	0.10974
80	0.04403
81	--
82	--
83	--
84	--
85	--
86	--
87	0.12346
88	0.11455
89	0.04002
90	0.0185
91	0.0162
92	0.02451
93	0.01788
94	0.00849
95	0.0084
96	0.02316
97	0.01501
98	0.02453
99	0.01982
100	0.01048
101	0.01438
102	0.01424
103	0.02198
104	0.01184
105	--
106	0.01556
107	0.01816
108	0.02263
109	0.01666
110	0.01321
111	0.01759
112	0.01397
113	0.01022
114	0.02075
115	0.01342
116	None
117	--
118	0.00858
119	0.01994
120	--
121	--
122	0.0082
123	0.0209
124	0.0181
125	0.01841
126	--
127	0.01717
128	0.01687
129	0.01525
130	0.01234
131	0.0111
132	0.02103
133	0.02037
134	0.02071
135	0.02362
136	0.02301
137	0.01091
138	0.02676
139	0.01845
140	0.0015
141	0.01894
142	0.0167
143	0.01388
144	--
145	--
146	--
147	--
148	0.01872
149	0.01747
150	--
151	0.02207
152	0.0229
153	0.01584
154	0.021
155	0.02273
156	0.00818
157	0.02038
158	0.01854
159	0.01345
160	0.01576
161	0.01222

## Sheet: Fig4 g
Residues	R1	s.d.	R2	s.d.	R2/R1	s.d
	s-1		s-1
C84Y	C84Y		C84Y			prop. err div
3	--	--	--	--	--	--
4	1.64828	0.19287	10.7552	1.74616	6.5251	1.8229
5	1.71972	0.0795	13.2008	1.43964	7.67614	1.19199
6	1.4178	0.14168	13.3274	0.5173	9.40006	1.3042
7	1.5582	0.06965	11.614	0.60951	7.45346	0.72433
8	--	--	--	--	--	--
9	1.61814	0.07639	11.9172	0.70441	7.36478	0.783
10	1.56572	0.03248	11.1044	0.70316	7.09217	0.59622
11	1.61572	0.22881	11.5809	1.12666	7.16762	1.71235
12	1.35603	0.10815	11.1964	1.00013	8.25676	1.39606
13	1.41881	0.04681	9.96881	0.6579	7.02618	0.69551
14	1.72454	0.24602	12.1744	1.312	7.05951	1.76788
15	1.41153	0.02809	13.0037	0.64071	9.21247	0.63724
16	1.20088	0.15737	11.9257	0.27844	9.93077	1.53325
18	1.34517	0.05053	12.2546	0.38827	9.11008	0.63085
19	1.26566	0.09508	12.1815	0.29879	9.62461	0.9591
20	1.37305	0.0927	13.957	1.04536	10.165	1.44762
25	--	--	--	--	--	--
26	1.26303	0.07639	14.0544	0.74431	11.1275	1.26232
29	1.37944	0.16258	15.5436	1.8852	11.2681	2.69469
30	--	--	--	--	--	--
31	1.32214	0.21207	12.5371	1.84667	9.48243	2.9177
32	--	--	--	--	--	--
33	1.6	0.16945	17.2374	1.83801	10.7734	2.28972
34	1.54133	0.17673	12.3153	2.13333	7.99005	2.30023
35	1.33326	0.10888	16.7085	1.20764	12.5321	1.92921
40	1.26749	0.14578	11.8986	0.33248	9.38753	1.34202
41	1.62109	0.21736	14.544	2.05202	8.97174	2.46878
42	--	--	--	--	--	--
43	1.71247	0.15319	10.5158	1.55029	6.14074	1.45462
44	--	--	--	--	--	--
45	1.51194	0.04776	14.3943	1.3412	9.52042	1.18781
46	1.27324	0.03753	14.0189	0.74355	11.0104	0.90852
47	--	--	--	--	--	--
48	1.39746	0.04692	14.1403	0.28869	10.1186	0.54631
49	1.51149	0.13086	10.6344	0.65082	7.03569	1.03971
50	--	--	--	--	--	--
51	--	--	--	--	--	--
53	1.52838	0.09081	11.417	1.3755	7.46999	1.34381
55	1.37884	0.05536	11.396	0.30354	8.26489	0.55197
56	1.36737	0.06324	10.2604	0.74977	7.50372	0.89537
57	1.24027	0.08379	11.6836	0.81814	9.42024	1.29606
65	1.44378	0.10853	14.097	0.89012	9.76396	1.35048
66	--	--	--	--	--	--
67	1.23841	0.07772	13.4657	1.61483	10.8734	1.98635
68	1.42805	0.14384	13.2015	0.64838	9.2444	1.38517
69	1.45069	0.03069	12.535	1.23183	8.6407	1.03193
70	1.29138	0.12815	15.6649	1.73783	12.1304	2.54947
71	1.51408	0.0956	15.0691	1.58424	9.95261	1.67475
72	--	--	--	--	--	--
73	1.56549	0.11694	11.2621	2.31445	7.19398	2.0158
74	1.48479	0.15639	14.7051	1.34677	9.90384	1.9502
77	1.4924	0.0785	14.0078	1.07321	9.38612	1.21283
78	--	--	--	--	--	--
79	--	--	--	--	--	--
80	--	--	--	--	--	--
87	--	--	--	--	--	--
88	1.30083	0.16311	7.57617	0.97776	5.8241	1.48192
89	1.18623	0.2761	5.93672	1.69538	5.0047	2.59408
90	1.49802	0.12478	6.57739	1.4655	4.39072	1.34402
91	1.44947	0.28732	7.88422	1.16043	5.43938	1.87881
92	--	--	--	--	--	--
93	1.36777	0.06753	11.7825	2.52346	8.61435	2.27026
94	1.6579	0.17169	9.34961	1.30781	5.63943	1.37285
95	1.57829	0.08988	12.6184	1.08841	7.99498	1.14491
96	1.53554	0.10808	9.60807	0.99301	6.25713	1.0871
97	1.57511	0.07654	11.4437	0.80945	7.26531	0.86695
98	--	--	--	--	--	--
99	1.68998	0.19183	12.5521	0.75433	7.42737	1.28944
100	--	--	--	--	--	--
101	1.47249	0.126	12.8418	0.91379	8.72115	1.36684
102	1.37397	0.18373	12.7959	0.81132	9.31307	1.83586
103	--	--	--	--	--	--
104	1.38924	0.06967	10.0419	0.49749	7.22835	0.7206
106	1.32852	0.04134	10.6136	0.93426	7.98904	0.95183
107	1.54034	0.0574	9.67287	0.65209	6.2797	0.65735
108	1.54867	0.04263	9.31656	0.39969	6.01585	0.42368
109	1.42563	0.05569	10.8247	0.68931	7.59292	0.78012
110	1.62531	0.05247	11.0474	0.9369	6.79713	0.79588
111	1.50769	0.06936	11.299	0.72397	7.49425	0.82495
112	1.36698	0.12776	9.90929	0.67749	7.24904	1.17312
113	1.48071	0.09484	10.163	0.60284	6.86359	0.84674
114	1.40207	0.05046	10.8655	0.83034	7.74961	0.87113
115	1.34309	0.07034	11.4765	0.32752	8.54486	0.69136
116	1.56434	0.08349	9.74502	0.76808	6.22948	0.82346
118	--	--	--	--	--	--
119	1.72655	0.13652	11.5293	0.35435	6.67763	0.73324
121	1.20757	0.09264	14.9637	0.67359	12.3916	1.50844
122	--	--	--	--	--	--
123	1.698	0.04466	9.67646	0.40152	5.69874	0.38635
124	1.47986	0.12428	9.74279	1.31248	6.58359	1.43979
125	1.70882	0.12194	10.2761	1.87036	6.01355	1.52366
127	1.64455	0.09882	11.8302	1.49447	7.19355	1.341
128	1.27754	0.13945	9.84443	0.85273	7.70577	1.5086
129	1.59296	0.13356	9.59852	0.40037	6.02559	0.75655
130	1.60248	0.22724	11.4821	0.36405	7.16521	1.24324
131	1.73477	0.09524	11.928	1.00055	6.87585	0.95425
132	1.56945	0.06171	11.6457	0.45408	7.42025	0.58108
133	1.49301	0.04618	12.2802	0.61564	8.22514	0.66676
134	1.31892	0.05651	10.8788	0.65541	8.2483	0.85033
135	--	--	--	--	--	--
136	1.4882	0.18192	9.9602	0.55486	6.69278	1.19098
137	1.56126	0.08573	12.3543	0.70274	7.91303	0.88462
138	--	--	--	--	--	--
139	1.57468	0.07384	10.7335	0.77264	6.81632	0.8103
140	1.40452	0.12677	9.05326	0.88545	6.4458	1.21222
141	1.49786	0.08013	10.6694	0.30911	7.12308	0.58743
142	1.49558	0.1734	9.30584	0.37439	6.22223	0.97175
143	1.48833	0.05265	8.52567	0.55382	5.72835	0.57475
146	1.46846	0.0732	11.1503	0.49827	7.59318	0.71782
148	1.33922	0.09256	11.907	0.95047	8.89097	1.32422
149	1.40225	0.07966	10.6072	1.0605	7.56439	1.18601
151	--	--	--	--	--	--
152	1.38011	0.05255	12.1485	0.45303	8.80256	0.66343
153	1.43765	0.12116	11.1775	1.6794	7.77481	1.82339
154	--	--	--	--	--	--
155	1.32143	0.13857	11.21	1.04643	8.48326	1.68148
156	--	--	--	--	--	--
157	1.58293	0.07294	11.2512	0.43179	7.10782	0.6003
158	1.58498	0.09758	10.8108	0.44962	6.82078	0.7036
159	1.71075	0.09107	8.03909	0.54359	4.69916	0.5679
160	1.57515	0.06164	8.37154	0.47016	5.31476	0.50647
161	1.4844	0.03831	4.58411	0.30228	3.08819	0.28334

## Sheet: Fig4 h
Residue	R2eff	R2eff error	R2eff	R2eff error		Residue	R2eff	R2eff error	R2eff	R2eff error		Residue	R2eff	R2eff error	R2eff	R2eff error
Temperature	298K	298K	298K	298K		305K	305K	305K	305K	305K			310K	310K	310K	310K
cpmg pulse	50 Hz	50Hz	1000Hz	1000Hz			50 Hz	50 Hz	1000 Hz	1000 Hz			50 Hz	50Hz	1000 Hz	1000 Hz
C84Y						C84Y						C84Y
3AspH	22.0093	3.07441	19.8517	2.85792		3AspH	22.6146	4.48146	25.8397	5.00898		3AspH	--	--	--	--
4IleH	18.1096	1.7414	20.211	1.86672		4IleH	17.1993	1.90146	15.5069	1.80488		4IleH	16.4144	2.32661	15.4604	2.25816
5TyrH	18.2108	2.35264	15.7775	2.1763		5TyrH	16.4625	2.37125	12.9885	2.13774		5TyrH	14.9812	2.81582	13.0344	2.65505
6LysH	19.8859	1.78222	17.9386	1.67144		6LysH	16.4175	1.61015	14.6682	1.52692		6LysH	14.4568	1.71983	12.4132	1.61804
7AlaH	18.8252	1.11708	18.2936	1.09778		7AlaH	17.2251	0.92928	15.2725	0.87514		7AlaH	16.4202	0.75605	14.2559	0.70705
8AlaH	--	--	--	--		8AlaH	--	--	--	--		8AlaH	--	--	--	--
9ValH	19.5787	1.82151	19.3145	1.8056		9ValH	16.8008	1.58562	15.2578	1.51245		9ValH	16.0614	1.5334	16.8843	1.57378
10GluH	20.7672	1.11702	18.998	1.05294		10GluH	16.1244	0.71809	15.4054	0.70253		10GluH	15.9251	0.70566	13.9045	0.66318
11GlnH	18.4845	1.90207	17.9359	1.86832		11GlnH	14.824	1.71994	15.7227	1.76723		11GlnH	14.3843	2.11449	12.8495	2.01944
12LeuH	18.8993	1.63275	20.7718	1.73805		12LeuH	17.6949	1.70881	17.1481	1.67972		12LeuH	16.3288	1.62319	18.0166	1.71312
13ThrH	19.4378	1.78737	19.109	1.76802		13ThrH	17.5282	1.45587	16.1365	1.39425		13ThrH	13.8933	1.52639	14.9152	1.57461
14GluH	24.1486	2.04374	24.0625	2.03758		14GluH	23.8706	2.05953	23.035	2.00148		14GluH	--	--	--	--
15GluH	20.9289	1.28718	19.4906	1.22656		15GluH	16.3953	0.98764	16.4734	0.99003		15GluH	15.9134	0.96895	16.8559	0.99818
16GlnH	20.2855	1.26823	19.6542	1.24174		16GlnH	17.599	1.03645	16.6867	1.00732		16GlnH	15.3774	0.97223	16.3377	1.00185
18AsnH	20.1387	0.8115	19.4791	0.79383		18AsnH	16.8666	0.7991	17.198	0.8074		18AsnH	15.675	1.05123	14.3975	1.01068
19GluH	22.2509	1.54562	20.53	1.45769		19GluH	17.9039	1.30183	18.4473	1.32452		19GluH	16.7419	1.26077	17.237	1.28081
20PheH	24.3447	2.41893	20.7837	2.13939		20PheH	18.5857	1.8323	18.4018	1.82157		20PheH	18.2239	1.92225	17.2348	1.86193
25AspH	--	--	--	--		25AspH	--	--	--	--		25AspH	--	--	--	--
26IleH	23.817	2.10357	21.922	1.97004		26IleH	18.9261	1.50162	18.7623	1.49373		26IleH	17.4756	1.40394	16.6371	1.36689
29LeuH	34.7459	5.24302	31.7356	4.68402		29LeuH	26.2	3.05779	25.7847	3.01348		29LeuH	24.0297	2.93904	22.5847	2.79548
30GlyH	--	--	--	--		30GlyH	21.7118	7.82343	22.6026	8.06172		30GlyH	--	--	--	--
31AlaH	19.0054	1.60641	19.1272	1.61289		31AlaH	17.7603	1.4122	19.0018	1.46926		31AlaH	17.0102	1.56193	16.6389	1.54361
32GluH	--	--	--	--		32GluH	--	--	--	--		32GluH	--	--	--	--
33AspH	24.7749	2.39662	27.1237	2.60598		33AspH	27.4171	2.76351	22.2417	2.30906		33AspH	25.878	2.94222	19.2887	2.34636
34GlyH	25.4555	2.6254	20.7629	2.23107		34GlyH	17.0907	1.92362	18.4365	2.00713		34GlyH	19.2819	2.28765	15.8244	2.04709
35CysH	37.7119	4.64636	31.796	3.71723		35CysH	24.4875	2.07848	22.0317	1.91136		35CysH	18.4524	1.70192	18.9785	1.73147
40GluH	24.4746	2.48173	25.5195	2.57514		40GluH	18.8279	1.54862	20.154	1.61674		40GluH	19.0874	1.55721	17.3353	1.47108
41LeuH	21.1495	4.79922	17.0712	4.19431		41LeuH	15.5666	3.15366	14.7134	3.0737		41LeuH	16.1997	2.98783	18.9741	3.26664
42GlyH	25.8058	4.30996	20.2314	3.55313		42GlyH	29.3701	4.88852	28.1039	4.67063		42GlyH	--	--	--	--
43LysH	23.859	2.8282	21.5433	2.61077		43LysH	18.9188	2.19442	20.5861	2.31696		43LysH	19.6249	2.33027	19.6411	2.33153
44ValH	--	--	--	--		44ValH	--	--	--	--		44ValH	--	--	--	--
45MetH	20.4224	2.45506	21.9995	2.59014		45MetH	20.3403	1.96966	20.0438	1.95059		45MetH	16.9227	1.78129	18.7036	1.88667
46ArgH	23.794	1.78739	22.6844	1.71978		46ArgH	20.1503	1.19639	18.4825	1.13351		46ArgH	18.4556	1.06034	17.1404	1.01628
47MetH	--	--	--	--		47MetH	--	--	--	--		47MetH	--	--	--	--
48LeuH	24.0327	1.47874	21.6035	1.35958		48LeuH	18.6378	1.06303	18.6662	1.064		48LeuH	17.1548	0.96731	15.6726	0.92311
49GlyH	22.096	1.93801	20.2884	1.82265		49GlyH	18.4886	1.69945	16.8397	1.61337		49GlyH	15.9536	1.55943	17.1925	1.62177
50GlnH	--	--	--	--		50GlnH	--	--	--	--		50GlnH	--	--	--	--
51AsnH	28.9444	3.96286	26.658	3.64808		51AsnH	--	--	--	--		51AsnH	--	--	--	--
53ThrH	22.3156	2.15506	19.7652	1.97663		53ThrH	17.9914	1.6882	18.1755	1.6981		53ThrH	15.2525	1.67852	15.5121	1.69208
55GluH	19.9489	1.35838	19.9494	1.35841		55GluH	18.0827	1.18142	16.6892	1.13088		55GluH	15.2708	1.14629	16.0796	1.17554
56GluH	19.986	1.42413	21.3958	1.49352		56GluH	17.7893	1.19511	17.7872	1.19503		56GluH	13.664	1.07735	16.1578	1.16313
57LeuH	23.4024	2.33296	23.5009	2.34097		57LeuH	19.4899	1.90526	20.6467	1.97881		57LeuH	20.2541	2.1974	18.559	2.07773
65AspH	26.0035	3.42967	23.5734	3.14785		65AspH	18.6415	2.31673	16.2406	2.14847		65AspH	20.0871	1.94961	16.1995	1.71871
66GluH	18.7403	3.98423	22.5842	4.53564		66GluH	18.0885	3.79948	17.7194	3.75534		66GluH	14.1624	4.36313	17.3272	4.81569
67AspH	18.6204	1.97468	20.0733	2.07214		67AspH	14.8817	1.72549	14.1026	1.68601		67AspH	16.3884	1.84485	15.2375	1.77972
68GlyH	21.7235	1.758	22.9311	1.83258		68GlyH	17.1512	1.41399	17.2164	1.41688		68GlyH	16.0912	1.3797	17.4258	1.43939
69SerH	23.5564	2.07071	23.7129	2.08205		69SerH	20.8652	1.64895	19.2524	1.56415		69SerH	16.8504	1.57197	16.9455	1.57673
70GlyH	22.0623	2.9121	21.521	2.8587		70GlyH	18.1816	2.51984	19.6156	2.6388		70GlyH	17.3577	2.61923	15.7665	2.49067
71ThrH	26.3742	2.5895	22.7048	2.27578		71ThrH	17.1696	1.96393	16.9497	1.9505		71ThrH	17.3855	2.09406	18.8182	2.19361
72ValH	--	--	--	--		72ValH	22.9004	7.97865	22.6557	7.91265		72ValH	--	--	--	--
73AspH	22.688	5.05623	17.354	4.2304		73AspH	22.1522	4.26551	19.5267	3.91052		73AspH	18.457	3.73815	18.7325	3.77194
74PheH	24.1143	2.38408	22.928	2.28753		74PheH	20.6015	2.62317	18.6883	2.46487		74PheH	17.5404	2.66668	15.8077	2.5242
77PheH	23.8263	3.47548	26.9154	3.87796		77PheH	22.0986	2.68853	20.3573	2.53718		77PheH	20.7644	2.70313	22.5577	2.87314
78LeuH	26.3177	4.12756	32.4245	5.16094		78LeuH	19.182	3.40317	21.8529	3.7162		78LeuH	22.3399	3.09562	17.1567	2.60663
79ValH	20.4374	8.08952	15.7458	6.94389		79ValH	19.3868	4.11866	17.9979	3.93926		79ValH	20.0446	4.2992	15.1915	3.67802
80MetH	--	--	--	--		80MetH	--	--	--	--		80MetH	--	--	--	--
87AspH	20.5159	2.94725	18.462	2.75287		87AspH	26.3305	4.12434	23.4115	3.72654		87AspH	28.6956	6.72123	17.2743	4.53659
88AspH	17.0256	1.66237	18.6116	1.75012		88AspH	17.7154	1.99188	19.8894	2.13593		88AspH	25.4703	3.43089	23.5222	3.20426
89SerH	19.8953	1.88778	17.7048	1.75651		89SerH	21.4412	2.6341	19.286	2.45393		89SerH	26.9145	4.35864	27.7565	4.49271
90LysH	20.7841	1.54618	17.7382	1.39784		90LysH	20.22	2.14209	23.1485	2.36268		90LysH	25.2089	3.79063	29.6166	4.44224
91GlyH	16.2315	1.33145	16.0065	1.32203		91GlyH	18.5107	1.76576	19.3605	1.81473		91GlyH	21.2988	2.95771	22.0289	3.03209
92LysH	--	--	--	--		92LysH	--	--	--	--		92LysH	--	--	--	--
93SerH	20.7946	1.73957	17.4194	1.55601		93SerH	22.261	2.05385	20.1621	1.91534		93SerH	28.5751	3.99465	23.9183	3.3838
94GluH	21.4515	1.8955	25.2419	2.16257		94GluH	24.4097	2.4941	27.6633	2.79633		94GluH	27.5916	3.94763	26.6992	3.82308
95GluH	20.2939	1.45562	20.3421	1.45798		95GluH	17.9112	1.48215	19.4327	1.55622		95GluH	19.1018	1.71987	18.9261	1.70997
96GluH	25.4473	1.28636	25.4756	1.28765		96GluH	20.3562	0.97889	20.2893	0.97674		96GluH	19.1834	0.87842	18.141	0.849
97LeuH	22.296	1.92568	23.231	1.98894		97LeuH	22.8515	1.75981	16.9822	1.45304		97LeuH	17.0258	1.50456	17.4013	1.52273
98SerH	--	--	--	--		98SerH	--	--	--	--		98SerH	--	--	--	--
99AspH	17.2021	1.43925	19.5683	1.55506		99AspH	16.9937	1.09662	17.6164	1.11823		99AspH	15.3557	1.08191	13.7368	1.02976
100LeuH	--	--	--	--		100LeuH	--	--	--	--		100LeuH	--	--	--	--
101PheH	22.2626	1.48116	24.011	1.57382		101PheH	19.2713	1.31423	19.4489	1.32181		101PheH	17.9556	1.29223	17.9913	1.29372
102ArgH	22.6565	2.00499	21.1888	1.9067		102ArgH	16.7747	1.72889	19.6938	1.89717		102ArgH	15.5712	2.09435	16.9726	2.1888
103MetH	--	--	--	--		103MetH	--	--	--	--		103MetH	--	--	--	--
104PheH	19.9288	1.77553	19.5066	1.75073		104PheH	16.8606	1.41345	16.4671	1.39632		104PheH	15.7762	1.31901	15.4171	1.30435
106LysH	18.0513	1.48864	15.2316	1.36083		106LysH	13.2274	1.25604	13.7404	1.27492		106LysH	12.9587	1.14012	13.4886	1.15823
107AsnH	15.2179	1.02584	17.7189	1.11061		107AsnH	14.0245	0.92627	13.7964	0.92008		107AsnH	11.9202	0.93169	12.5093	0.9478
108AlaH	15.7239	1.11974	17.8388	1.19791		108AlaH	14.3461	0.89095	17.3308	0.97587		108AlaH	13.0955	0.82607	14.8161	0.87008
109AspH	17.7494	1.10686	17.5268	1.09892		109AspH	14.9277	0.8829	14.5744	0.87363		109AspH	13.5778	0.80793	12.7837	0.7891
110GlyH	17.4937	2.03291	17.9211	2.06124		110GlyH	17.096	1.91778	16.0712	1.85793		110GlyH	15.6621	1.94878	12.3061	1.76108
111TyrH	16.7411	1.19375	16.8836	1.19919		111TyrH	15.604	0.9668	14.1959	0.92686		111TyrH	12.7832	0.90752	12.8936	0.91048
112IleH	19.8474	2.2469	20.1469	2.26951		112IleH	16.6856	1.86475	16.4866	1.8533		112IleH	14.3441	1.97059	13.8796	1.94309
113AspH	19.4876	2.41132	21.5218	2.58223		113AspH	14.9108	1.73582	17.0682	1.85426		113AspH	14.8813	1.70747	16.4962	1.79559
114LeuH	20.5368	1.53824	21.698	1.60004		114LeuH	16.3699	1.01363	16.575	1.02007		114LeuH	14.5189	0.84631	13.33	0.81651
115GluH	17.0834	0.78494	18.4224	0.81974		115GluH	16.1579	0.62875	15.5119	0.61648		115GluH	14.6101	0.58436	13.9314	0.57245
116Glu[158]	21.1489	1.91981	19.0762	1.79105		116Glu[158]	16.015	1.45394	15.4825	1.43055		116Glu[158]	14.1725	1.49191	14.6051	1.51168
118LysH	--	--	--	--		118LysH	--	--	--	--		118LysH	--	--	--	--
119IleH	21.1499	2.24006	18.4594	2.04778		119IleH	15.7298	1.60101	14.3855	1.53763		119IleH	14.6986	1.59583	12.44	1.4915
121LeuH	26.5735	2.26457	21.8599	1.91947		121LeuH	19.2467	1.83001	17.5538	1.73377		121LeuH	21.0838	2.15562	16.762	1.87074
122GlnH	--	--	--	--		122GlnH	--	--	--	--		122GlnH	--	--	--	--
123AlaH	13.2775	0.88753	15.2857	0.94368		123AlaH	13.6343	0.83433	14.8628	0.86519		123AlaH	13.6733	0.83154	13.6671	0.83139
124ThrH	18.1698	1.39358	17.9827	1.38512		124ThrH	17.3182	1.33462	18.0504	1.3658		124ThrH	15.9713	1.2974	17.7208	1.37158
125GlyH	15.8433	1.13657	16.5348	1.16169		125GlyH	17.7712	1.36203	16.5535	1.31117		125GlyH	17.0299	1.46968	17.8806	1.51037
127ThrH	22.3604	1.67037	20.8294	1.58536		127ThrH	23.4189	2.15275	24.3788	2.22499		127ThrH	24.198	3.30912	21.3783	3.00276
128IleH	17.2671	1.34175	15.8657	1.28326		128IleH	14.6638	1.09777	13.1074	1.04878		128IleH	13.0833	1.19547	12.5875	1.17811
129ThrH	18.767	1.95357	16.5079	1.81592		129ThrH	15.5877	1.51756	13.8991	1.44294		129ThrH	14.4678	1.63892	13.5545	1.59433
130GluH	19.0911	1.75293	20.5396	1.83974		130GluH	21.5074	2.21517	21.1175	2.18658		130GluH	25.0128	3.54973	22.7915	3.28517
131AspH	15.5442	1.58991	15.6893	1.59715		131AspH	14.8775	1.37409	15.3608	1.39422		131AspH	14.8459	1.38264	12.9368	1.30535
132AspH	20.8489	0.89549	19.2751	0.84953		132AspH	16.3657	0.77076	15.9379	0.76071		132AspH	16.6794	0.91842	13.8582	0.84169
133IleH	23.6659	1.08563	20.6271	0.97808		133IleH	17.3637	0.83848	16.902	0.82647		133IleH	15.8635	0.74438	14.0259	0.70349
134GluH	17.6396	1.15312	17.9576	1.16508		134GluH	14.0955	1.02418	15.4623	1.06688		134GluH	14.7524	1.00327	14.4086	0.99279
135GluH	--	--	--	--		135GluH	--	--	--	--		135GluH	--	--	--	--
136LeuH	15.6073	1.20514	15.8602	1.21473		136LeuH	14.7339	0.9325	15.2467	0.94696		136LeuH	14.598	0.90798	13.8572	0.88781
137MetH	19.3701	1.58496	19.3713	1.58503		137MetH	14.8151	1.25267	15.4497	1.27683		137MetH	15.1429	1.2036	14.0816	1.1652
138LysH	--	--	--	--		138LysH	--	--	--	--		138LysH	--	--	--	--
139AspH	16.0269	1.72025	16.095	1.72394		139AspH	14.0258	1.3145	13.3516	1.28886		139AspH	13.1757	0.98287	13.3144	0.98693
140GlyH	18.0976	1.89185	16.7228	1.80984		140GlyH	16.7818	1.62947	15.956	1.58852		140GlyH	15.3499	1.63135	13.4541	1.5399
141AspH	19.074	1.56802	18.1389	1.52064		141AspH	14.6696	1.33045	15.0491	1.34565		141AspH	14.8774	1.31875	14.4196	1.30041
142LysH	16.3127	1.28056	16.6218	1.29319		142LysH	14.4167	1.05561	13.8276	1.03744		142LysH	12.8481	1.02793	12.9297	1.03041
143AsnH	16.7305	1.09312	15.3381	1.04618		143AsnH	13.2829	0.89072	13.1069	0.8862		143AsnH	11.387	0.89537	11.6775	0.90286
146GlyH	20.5515	2.14587	18.7214	2.01906		146GlyH	14.6472	1.7172	13.6632	1.66806		146GlyH	12.8744	1.62725	14.2531	1.69581
148IleH	17.2443	2.15504	17.5537	2.17663		148IleH	16.4768	1.89525	15.7555	1.85378		148IleH	14.1631	1.77645	14.4969	1.79456
149AspH	20.4681	2.49377	23.5084	2.76759		149AspH	17.2935	2.11262	16.1787	2.04081		149AspH	15.1961	2.01047	16.1406	2.0705
151AspH	--	--	--	--		151AspH	--	--	--	--		151AspH	--	--	--	--
152GluH	22.4766	1.83274	20.47	1.71164		152GluH	18.4114	1.52505	15.5233	1.39388		152GluH	15.5393	1.45164	14.6964	1.41439
153PheH	20.3117	2.76206	22.4264	2.96812		153PheH	14.8783	2.01227	15.3628	2.04182		153PheH	15.8861	2.25342	15.6528	2.23707
154LeuH	--	--	--	--		154LeuH	--	--	--	--		154LeuH	--	--	--	--
155GluH	22.4213	2.87143	17.9193	2.46939		155GluH	18.3764	2.15426	15.2407	1.95438		155GluH	18.5237	2.41348	14.4288	2.12078
156PheH	--	--	--	--		156PheH	--	--	--	--		156PheH	--	--	--	--
157MetH	20.4525	1.7661	18.034	1.6302		157MetH	14.5527	1.30638	15.6225	1.34909		157MetH	14.1907	1.16387	14.155	1.16262
158LysH	18.4264	1.02439	16.9015	0.97506		158LysH	15.36	0.96777	13.3281	0.91125		158LysH	14.4188	1.07271	14.3583	1.07074
159GlyH	16.7414	1.26926	15.3179	1.21357		159GlyH	12.8717	1.16279	12.8204	1.16108		159GlyH	14.6502	1.36483	12.8346	1.29238
160ValH	15.5477	0.63663	14.4759	0.61585		160ValH	12.9856	0.59083	11.0928	0.56018		160ValH	11.818	0.62423	10.7021	0.6047
161GluH	10.7712	0.81931	9.55604	0.79193		161GluH	8.07902	0.6547	8.31839	0.6587		161GluH	7.47858	0.70118	8.16651	0.71389

## Sheet: Fig5 - 3mo Graphs
		3 MONTHS
		Wild-Type		Heterozygotes
Parameter	Units	Mean	SE	Mean	SE	SIG
Series Name
IVRT	ms	20.9915	2.36797	24.9802	4.00553
MV E/A	none	1.48815	0.031807	1.08859	0.0938704	Y
Heart Rate	BPM	504.029	7.40824	449.951	11.5903	Y
LVPW;d	mm	1.03594	0.101358	1.03214	0.0521237
LVPW;s	mm	1.23368	0.0792381	1.30125	0.0359509
CO (LV Trace)	ml/min	20.1076	1.74302	13.564	1.49839	Y
Diameter;d (LV Trace)	mm	4.22304	0.108995	3.62497	0.175742	Y
Diameter;s (LV Trace)	mm	3.15785	0.115282	2.56123	0.226639
SV (LV Trace)	ul	39.9107	3.4456	30.9226	2.77828
		IVRT	ST. ER.			MV E/A	ST. ER.			HR	ST. ER.			LVPW;d	ST. ER.			LVPW;s	ST. ER.
	WT	20.9915	2.36797		WT	1.48815	0.031807		WT	504.029	7.40824		WT	1.03594	0.101358		WT	1.23368	0.0792381
	HT	24.9802	4.00553		HT	1.08859	0.0938704		HT	449.951	11.5903		HT	1.03214	0.0521237		HT	1.30125	0.0359509
		CO	ST. ER.			Diameter;d	ST. ER.			Diameter;s	ST. ER.			SV	ST. ER.
	WT	20.1076	1.74302		WT	4.22304	0.108995		WT	3.15785	0.115282		WT	39.9107	3.4456
	HT	13.564	1.49839		HT	3.62497	0.175742		HT	2.56123	0.226639		HT	30.9226	2.77828

## Sheet: Fig5 - 6mo Graphs
		6 MONTHS
		Wild-Type		Heterozygotes
Parameter	Units	Mean	SE	Mean	SE	SIG
Series Name
IVRT	ms	15.046	2.44691	22.5185	1.0736	Y
MV E/A	none	1.4158	0.0967911	1.16448	0.0821318
Heart Rate	BPM	500.919	4.73047	451.64	12.748	Y
LVPW;d	mm	0.779167	0.0644593	1.22567	0.0788128	Y
LVPW;s	mm	1.13865	0.107227	1.4649	0.0252192	Y
CO (LV Trace)	ml/min	22.4162	1.90391	15.3086	0.956939	Y
Diameter;d (LV Trace)	mm	4.23545	0.071309	3.70445	0.114767	Y
Diameter;s (LV Trace)	mm	2.9948	0.126944	2.57332	0.162258
SV (LV Trace)	ul	45.0155	3.71448	33.9502	2.07876	Y
		IVRT	ST. ER.			MV E/A	ST. ER.			HR	ST. ER.			LVPW;d	ST. ER.			LVPW;s	ST. ER.
	WT	15.046	2.44691		WT	1.4158	0.0967911		WT	500.919	4.73047		WT	0.779167	0.0644593		WT	1.13865	0.107227
	HT	22.5185	1.0736		HT	1.16448	0.0821318		HT	451.64	12.748		HT	1.22567	0.0788128		HT	1.4649	0.0252192
		CO	ST. ER.			Diameter;d	ST. ER.			Diameter;s	ST. ER.			SV	ST. ER.
	WT	22.4162	1.90391		WT	4.23545	0.071309		WT	2.9948	0.126944		WT	45.0155	3.71448
	HT	15.3086	0.956939		HT	3.70445	0.114767		HT	2.57332	0.162258		HT	33.9502	2.07876

## Sheet: Fig5 - WT vs HET
		3 MONTHS								6 MONTHS
			Wild-Type				Heterozygotes				Wild-Type				Heterozygotes
Parameter	Units	SIG	Mean	SD	SE		Mean	SD	SE	SIG	Mean	SD	SE		Mean	SD	SE
AET	ms		44.3761	1.3834	0.618677		51.0714	7.61136	2.87682		46.446	4.57458	2.04582		51.6296	4.3143	1.7613		TO GRAPH
IVCT	ms	Y	13.8632	4.09993	1.83354		28.1151	9.75585	3.68736		20.3984	4.74992			20.1389	9.77328	3.98992
IVRT	ms		20.9915	5.29494	2.36797		24.9802	10.5976	4.00553	Y	15.046	5.47145	2.44691		22.5185	2.62976	1.0736
MV A	mm/s		492.616	60.904	27.2371		562.224	133.629	50.5072		482.258	73.0297	32.6599		523.054	97.5686	39.8322
MV Decel	mm/s2		-95574.3	49561.8	22164.7		-61082.1	25751.8	9733.26		-75645.5	43620.6	19507.7		-73708.8	68664.1	28032
MV Decel	ms		9.91453	5.229	2.33848		12.2619	4.66311	1.76249		10.8937	5.12417	2.2916		12.9907	6.90459	2.81879
MV PHT	ms		10.5684	1.80948	0.809223		10.3175	2.6952	1.01869		10.0762	1.69855	0.759614		11.5185	2.24891	0.918115
NFT	ms	Y	79.1752	3.24039	1.44915		103.651	13.378	5.05642		81.946	7.16445	3.20404		94.3796	10.3671	4.23233
MV E/A	none	Y	1.48815	0.0711226	0.031807		1.08859	0.248358	0.0938704		1.4158	0.216431	0.0967911		1.16448	0.201181	0.0821318
Heart Rate	BPM	Y	504.029	16.5653	7.40824		449.951	30.665	11.5903	Y	500.919	10.5777	4.73047		451.64	31.2262	12.748
LVAW;d	mm		1.21066	0.15787	0.0706018		1.25531	0.1977	0.0747237		1.13156	0.0843241	0.0377109		1.26454	0.166741	0.0680718
LVAW;s	mm		1.53295	0.223699	0.100041		1.62452	0.245182	0.09267		1.51938	0.160673	0.0718552		1.65674	0.199026	0.0812518
LVPW;d	mm		1.03594	0.226643	0.101358		1.03214	0.137906	0.0521237	Y	0.779167	0.144135	0.0644593		1.22567	0.193051	0.0788128
LVPW;s	mm		1.23368	0.177182	0.0792381		1.30125	0.0951171	0.0359509	Y	1.13865	0.239767	0.107227		1.4649	0.0617742	0.0252192
CO (LV Trace)	ml/min	Y	20.1076	3.8975	1.74302		13.564	3.96436	1.49839	Y	22.4162	4.25728	1.90391		15.3086	2.34401	0.956939
Diameter;d (LV Trace)	mm	Y	4.22304	0.243721	0.108995		3.62497	0.464969	0.175742	Y	4.23545	0.159452	0.071309		3.70445	0.28112	0.114767
Diameter;s (LV Trace)	mm		3.15785	0.257779	0.115282		2.56123	0.599631	0.226639		2.9948	0.283856	0.126944		2.57332	0.397448	0.162258
EF (LV Trace)	%		49.8948	7.47788	3.34421		56.7758	13.4238	5.07373		56.1348	9.09174	4.06595		58.7104	10.0406	4.09906
FS (LV Trace)	%		25.2125	4.57385	2.04549		29.8835	9.70465	3.66801		29.3042	5.83555	2.60974		30.8466	7.03415	2.87168
LV Mass Corr (LV Trace)	mg		157.816	23.4169	10.4723		134.094	28.2988	10.6959		131.252	22.8084	10.2002		158.733	35.1859	14.3646
SV (LV Trace)	ul		39.9107	7.7046	3.4456		30.9226	7.35064	2.77828	Y	45.0155	8.30584	3.71448		33.9502	5.0919	2.07876
V;d (LV Trace)	ul	Y	79.9325	11.138	4.98109		56.5718	17.5057	6.61652	Y	80.2967	6.99751	3.12938		58.7457	10.092	4.12004
V;s (LV Trace)	ul		40.0218	7.80156	3.48896		25.6492	14.2947	5.4029		35.2812	8.59045	3.84176		24.7955	8.01151	3.27069
MV E	mm/s		731.37	79.1345	35.39		602.238	176.609	66.752		684.899	157.985	70.6529		601.16	102.563	41.8713
MV PHT	mm/s2		71829.9	14977.2	6698.01		60923.5	18159.7	6863.71		71831.2	29956.9	13397.1		54274.2	12320	5029.61
LV MPI IV	none		0.785136	0.0247941	0.0110882		1.07205	0.390168	0.14747		0.783167	0.281169	0.125742		0.83329	0.227747	0.0929772
LV MPI NFT	none		0.783829	0.0274615	0.0122812		1.06198	0.39204	0.148177		0.784482	0.282258	0.12623		0.835253	0.225598	0.0921001
MV Area	mm2		21.2488	3.17417	1.41953		22.9441	7.46124	2.82008		22.4219	4.39818	1.96693		19.886	4.90315	2.0017
AET	ms		44.3761	1.3834	0.618677		51.0714	7.61136	2.87682		46.446	4.57458	2.04582		51.6296	4.3143	1.7613
Diameter;s	mm		3.15785	0.257779	0.115282		2.56123	0.599631	0.226639		2.9948	0.283856	0.126944		2.57332	0.397448	0.162258
Diameter;d	mm		4.22304	0.243721	0.108995		3.62497	0.464969	0.175742		4.23545	0.159452	0.071309		3.70445	0.28112	0.114767
Volume;s	ul		40.0218	7.80156	3.48896		25.6492	14.2947	5.4029		35.2812	8.59045	3.84176		24.7955	8.01151	3.27069
Volume;d	ul		79.9325	11.138	4.98109		56.5718	17.5057	6.61652		80.2967	6.99751	3.12938		58.7457	10.092	4.12004
Stroke Volume	ul		39.9107	7.7046	3.4456		30.9226	7.35064	2.77828		45.0155	8.30584	3.71448		33.9502	5.0919	2.07876
Ejection Fraction	%		49.8948	7.47788	3.34421		56.7758	13.4238	5.07373		56.1348	9.09174	4.06595		58.7104	10.0406	4.09906
Fractional Shortening	%		25.2125	4.57385	2.04549		29.8835	9.70465	3.66801		29.3042	5.83555	2.60974		30.8466	7.03415	2.87168
Cardiac Output	ml/min		20.1076	3.8975	1.74302		13.564	3.96436	1.49839		22.4162	4.25728	1.90391		15.3086	2.34401	0.956939
LV Mass	mg		197.27	29.2711	13.0904		167.617	35.3735	13.3699		164.065	28.5105	12.7503		198.417	43.9823	17.9557
LV Mass Cor	mg		157.816	23.4169	10.4723		134.094	28.2988	10.6959		131.252	22.8084	10.2002		158.733	35.1859	14.3646
LVID;d	mm		4.12958	0.259675	0.11613		3.6084	0.477089	0.180323		4.20396	0.162106	0.0724961		3.687	0.28717	0.117237
LVID;s	mm		3.23236	0.338642	0.151445		2.55656	0.629485	0.237923		2.98917	0.302833	0.135431		2.58757	0.387522	0.158205
EF	%		43.2217	15.8436	7.08549		56.56	14.2219	5.37536		55.6002	9.52149	4.25814		57.6455	10.228	4.17558
FS	%		21.5729	8.80299	3.93682		29.7833	10.2913	3.88974		28.9365	6.00883	2.68723		30.0942	6.9195	2.82488
LV Mass (LV Trace)	mg		197.27	29.2711	13.0904		167.617	35.3735	13.3699		164.065	28.5105	12.7503		198.417	43.9823	17.9557
LV Mass AW	mg		198.811	28.0584	12.5481		167.423	36.5469	13.8134		163.502	28.81	12.8842		197.72	41.7887	17.0602
LV Mass AW (Corrected)	mg		159.049	22.4467	10.0385		133.938	29.2375	11.0508		130.802	23.048	10.3074		158.176	33.431	13.6481
LV Vol;d	ul		75.857	11.7975	5.27599		56.0161	17.7061	6.69227		78.8933	7.03931	3.14808		58.0892	10.3788	4.23711
LV Vol;s	ul		42.5651	10.6963	4.78353		25.7022	14.7972	5.59282		35.1617	9.06074	4.05209		25.0833	8.01458	3.27194

## Sheet: Fig5 - 3 mo
		Re-Imaged					Wild-Type											Heterozygotes
Parameter	Units	152	156	157	158	162	Mean	SD	SE		153	154	155	159	160	161	163	Mean	SD	SE
AET	ms	44.1026	46.1111	43.8889	42.5	45.2778	44.3761	1.3834	0.618677		63.6111	54.1667	42.5	51.1111	45.8333	56.3889	43.8889	51.0714	7.61136	2.87682
IVCT	ms	18.2051	7.77778	13.8889	16.9444	12.5	13.8632	4.09993	1.83354		24.7222	21.3889	16.9444	30	47.0833	24.7222	31.9444	28.1151	9.75585	3.68736
IVRT	ms	17.1795	28.0556	21.1111	14.7222	23.8889	20.9915	5.29494	2.36797		23.8889	20.8333		18.6111	16.25	24.7222	48.0556	24.9802	10.5976	4.00553
MV A	mm/s	445.137	513.281	437.449	479.978	587.235	492.616	60.904	27.2371		609.845	352.748	556.713	681.117	723.518	590.804	420.823	562.224	133.629	50.5072
MV Decel	mm/s2	-36367.5	-81087.6	-71804.4	-164251	-124361	-95574.3	49561.8	22164.7		-31856	-38387	-44115.3	-52797.3	-96216	-90322.4	-73880.4	-61082.1	25751.8	9733.26
MV Decel	ms	18.4615	9.16667	10	4.44444	7.5	9.91453	5.229	2.33848		13.0556	13.3333	18.8889	16.9444	9.16667	8.33333	6.11111	12.2619	4.66311	1.76249
MV E	mm/s	659.005	732.39	704.186	696.318	864.95	731.37	79.1345	35.39		400.398	501.331	662.854	881.531	764.791	566.324	438.436	602.238	176.609	66.752
MV PHT	mm/s2	74847.8	53875.8	68838.7	66719.2	94867.8	71829.9	14977.2	6698.01		69339	39424.7	51889.2	83488.2	84065.1	44596.5	53661.9	60923.5	18159.7	6863.71
MV PHT	ms	9.23077	13.6111	10.2778	10.5556	9.16667	10.5684	1.80948	0.809223		5.83333	12.7778	12.7778	10.5556	9.16667	12.7778	8.33333	10.3175	2.6952	1.01869
NFT	ms	79.4872	81.9444	78.8889	73.8889	81.6667	79.1752	3.24039	1.44915		111.667	95	81.3889	99.4444	109.167	105.556	123.333	103.651	13.378	5.05642
LV MPI IV	none	0.802326	0.777108	0.797468	0.745098	0.803681	0.785136	0.0247941	0.0110882		0.764192	0.779487	0.928105	0.951087	1.38182	0.876847	1.82279	1.07205	0.390168	0.14747
LV MPI NFT	none	0.802326	0.777108	0.797468	0.738562	0.803681	0.783829	0.0274615	0.0122812		0.755459	0.753846	0.915033	0.945652	1.38182	0.871921	1.81013	1.06198	0.39204	0.148177
MV Area	mm2	23.8333	16.1633	21.4054	20.8421	24	21.2488	3.17417	1.41953		37.7143	17.2174	17.2174	20.8421	24	17.2174	26.4	22.9441	7.46124	2.82008
MV E/A	none	1.48045	1.42688	1.60976	1.45073	1.47292	1.48815	0.0711226	0.031807		0.656557	1.42122	1.19066	1.29424	1.05705	0.958564	1.04185	1.08859	0.248358	0.0938704
AET	ms	44.1026	46.1111	43.8889	42.5	45.2778	44.3761	1.3834	0.618677		63.6111	54.1667	42.5	51.1111	45.8333	56.3889	43.8889	51.0714	7.61136	2.87682
Heart Rate	BPM	494.33	525.954	482.416	506.304	511.141	504.029	16.5653	7.40824		402.067	460.211	491.426	445.927	480.401	442.621	427.004	449.951	30.665	11.5903
Diameter;s	mm	2.9522	3.28646	2.83363	3.25521	3.46177	3.15785	0.257779	0.115282		2.80214	1.80364	1.97118	3.47826	3.019	2.21415	2.6402	2.56123	0.599631	0.226639
Diameter;d	mm	4.08617	4.32468	4.10053	4.001	4.60281	4.22304	0.243721	0.108995		3.58532	3.51494	3.03024	4.39411	3.9507	3.15758	3.74187	3.62497	0.464969	0.175742
Volume;s	ul	33.6572	43.7328	30.4708	42.6978	49.5504	40.0218	7.80156	3.48896		29.6158	9.82626	12.3086	50.1314	35.5785	16.4844	25.5991	25.6492	14.2947	5.4029
Volume;d	ul	73.6403	84.2171	74.2529	70.0561	97.4959	79.9325	11.138	4.98109		53.9121	51.4063	35.9102	87.4259	67.971	39.6547	59.7221	56.5718	17.5057	6.61652
Stroke Volume	ul	39.9831	40.4843	43.7821	27.3583	47.9455	39.9107	7.7046	3.4456		24.2963	41.5801	23.6015	37.2945	32.3925	23.1703	34.123	30.9226	7.35064	2.77828
Ejection Fraction	%	54.2936	48.0108	58.9682	39.0359	49.1656	49.8948	7.47788	3.34421		45.0686	80.8931	65.5842	42.6691	47.6623	58.4278	57.1252	56.7758	13.4238	5.07373
Fractional Shortening	%	27.7511	23.9913	30.8972	18.6362	24.7867	25.2125	4.57385	2.04549		21.8444	48.69	34.9041	20.8453	23.5846	29.8775	29.4386	29.8835	9.70465	3.66801
Cardiac Output	ml/min	19.7646	21.2574	21.177	13.8583	24.4808	20.1076	3.8975	1.74302		9.76741	19.1417	11.5976	16.6459	15.2739	7.95369	14.5676	13.564	3.96436	1.49839
LV Mass	mg	159.459	213.334	232.023	205.718	175.814	197.27	29.2711	13.0904		203.429	127.367	139.373	163.97	218.576	136.954	183.65	167.617	35.3735	13.3699
LV Mass Cor	mg	127.567	170.667	185.618	164.574	140.651	157.816	23.4169	10.4723		162.743	101.894	111.498	131.176	174.861	109.563	146.92	134.094	28.2988	10.6959
LVAW;d	mm	1.17465	1.10382	1.37535	1.3724	1.02708	1.21066	0.15787	0.0706018		1.37838	1.1027	1.33243	0.895946	1.49324	1.32095	1.26351	1.25531	0.1977	0.0747237
LVAW;s	mm	1.54653	1.21597	1.82986	1.61146	1.46094	1.53295	0.223699	0.100041		1.59662	1.79189	1.73446	1.1027	1.83784	1.66554	1.64257	1.62452	0.245182	0.09267
LVID;d	mm	4.0316	3.97847	4.08472	3.96667	4.58646	4.12958	0.259675	0.11613		3.61824	3.50338	2.98649	4.37635	3.92838	3.10135	3.74459	3.6084	0.477089	0.180323
LVID;s	mm	2.96319	3.65382	2.83333	3.25833	3.45312	3.23236	0.338642	0.151445		2.82568	1.76892	1.89527	3.49189	3.00946	2.18243	2.7223	2.55656	0.629485	0.237923
LVPW;d	mm	0.832292	1.35764	1.15694	1.00937	0.823438	1.03594	0.226643	0.101358		1.24054	0.781081	1.1027	0.987838	1.0223	1.03378	1.05676	1.03214	0.137906	0.0521237
LVPW;s	mm	1.05069	1.37535	1.44028	1.23958	1.0625	1.23368	0.177182	0.0792381		1.48176	1.26351	1.275	1.1946	1.22905	1.3554	1.30946	1.30125	0.0951171	0.0359509
CO (LV Trace)	ml/min	19.7646	21.2574	21.177	13.8583	24.4808	20.1076	3.8975	1.74302		9.76741	19.1417	11.5976	16.6459	15.2739	7.95369	14.5676	13.564	3.96436	1.49839
Diameter;d (LV Trace)	mm	4.08617	4.32468	4.10053	4.001	4.60281	4.22304	0.243721	0.108995		3.58532	3.51494	3.03024	4.39411	3.9507	3.15758	3.74187	3.62497	0.464969	0.175742
Diameter;s (LV Trace)	mm	2.9522	3.28646	2.83363	3.25521	3.46177	3.15785	0.257779	0.115282		2.80214	1.80364	1.97118	3.47826	3.019	2.21415	2.6402	2.56123	0.599631	0.226639
EF	%	52.385	18.3832	58.6459	37.6362	49.0582	43.2217	15.8436	7.08549		45.1469	81.772	67.9486	41.5766	47.4026	58.1647	53.9085	56.56	14.2219	5.37536
EF (LV Trace)	%	54.2936	48.0108	58.9682	39.0359	49.1656	49.8948	7.47788	3.34421		45.0686	80.8931	65.5842	42.6691	47.6623	58.4278	57.1252	56.7758	13.4238	5.07373
FS	%	26.5007	8.16024	30.6358	17.8572	24.7104	21.5729	8.80299	3.93682		21.9047	49.5082	36.5385	20.21	23.3918	29.6296	27.3006	29.7833	10.2913	3.88974
FS (LV Trace)	%	27.7511	23.9913	30.8972	18.6362	24.7867	25.2125	4.57385	2.04549		21.8444	48.69	34.9041	20.8453	23.5846	29.8775	29.4386	29.8835	9.70465	3.66801
LV Mass (LV Trace)	mg	159.459	213.334	232.023	205.718	175.814	197.27	29.2711	13.0904		203.429	127.367	139.373	163.97	218.576	136.954	183.65	167.617	35.3735	13.3699
LV Mass AW	mg	162.858	214.927	233.315	203.698	179.258	198.811	28.0584	12.5481		205.62	119.352	139.761	170.073	217.923	139.618	179.615	167.423	36.5469	13.8134
LV Mass AW (Corrected)	mg	130.286	171.941	186.652	162.959	143.406	159.049	22.4467	10.0385		164.496	95.4813	111.809	136.058	174.338	111.695	143.692	133.938	29.2375	11.0508
LV Mass Corr (LV Trace)	mg	127.567	170.667	185.618	164.574	140.651	157.816	23.4169	10.4723		162.743	101.894	111.498	131.176	174.861	109.563	146.92	134.094	28.2988	10.6959
LV Vol;d	ul	71.3199	69.1083	73.5689	68.622	96.6659	75.857	11.7975	5.27599		55.0962	50.9869	34.6158	86.5842	67.0572	37.9561	59.8163	56.0161	17.7061	6.69227
LV Vol;s	ul	33.959	56.404	30.4237	42.7953	49.2433	42.5651	10.6963	4.78353		30.222	9.29391	11.0948	50.5855	35.2703	15.879	27.5702	25.7022	14.7972	5.59282
SV (LV Trace)	ul	39.9831	40.4843	43.7821	27.3583	47.9455	39.9107	7.7046	3.4456		24.2963	41.5801	23.6015	37.2945	32.3925	23.1703	34.123	30.9226	7.35064	2.77828
V;d (LV Trace)	ul	73.6403	84.2171	74.2529	70.0561	97.4959	79.9325	11.138	4.98109		53.9121	51.4063	35.9102	87.4259	67.971	39.6547	59.7221	56.5718	17.5057	6.61652
V;s (LV Trace)	ul	33.6572	43.7328	30.4708	42.6978	49.5504	40.0218	7.80156	3.48896		29.6158	9.82626	12.3086	50.1314	35.5785	16.4844	25.5991	25.6492	14.2947	5.4029

## Sheet: Fig5 - 6 mo
							Wild-Type										Heterozygotes
Parameter	Units	152	156	157	158	162	Mean	SD	SE		154	155	159	160	161	163	Mean	SD	SE
AET	ms	50.4444	41.1111	47.5	42.2222	50.9524	46.446	4.57458	2.04582		50.2778	51.3889	50	45.2778	55.3333	57.5	51.6296	4.3143	1.7613
IVCT	ms	20.4444	24.7222	21.6667	22.7778	12.381	20.3984	4.74992	2.12423		10.5556	36.3889	13.0556	26.3889	20	14.4444	20.1389	9.77328	3.98992
IVRT	ms	15.1111	20.2778	15.8333	18.0556	5.95238	15.046	5.47145	2.44691		22.2222	21.3889		23.8889	24	25.5556	22.5185	2.62976	1.0736
MV A	mm/s	524.697	389.574	566.992	425.218	504.809	482.258	73.0297	32.6599		553.152	409.283	519.634	478.685	696.318	481.25	523.054	97.5686	39.8322
MV Decel	mm/s2	-36053.3	-74224.5	-73769.7	-46502.4	-147678	-75645.5	43620.6	19507.7		-30702.9	-48460.9	-60090.8	-71985.7	-208792	-22221	-73708.8	68664.1	28032
MV Decel	ms	19.1111	7.22222	10	11.9444	6.19048	10.8937	5.12417	2.2916		18.6111	13.0556	11.6667	8.05556	3.77778	22.7778	12.9907	6.90459	2.81879
MV E	mm/s	679.265	534.249	766.153	538.442	906.389	684.899	157.985	70.6529		571.18	610.57	695.873	482.878	740.859	505.599	601.16	102.563	41.8713
MV PHT	mm/s2	60203.1	57617.3	63086	53223.6	125026	71831.2	29956.9	13397.1		42378.4	46388	64428.4	64985.5	66708.9	40755.9	54274.2	12320	5029.61
MV PHT	ms	11.3333	9.72222	11.6667	10.2778	7.38095	10.0762	1.69855	0.759614		13.6111	13.3333	10.8333	7.5	11.3333	12.5	11.5185	2.24891	0.918115
NFT	ms	86	86.1111	85	83.3333	69.2857	81.946	7.16445	3.20404		83.6111	109.167	81.3889	95.5556	99.3333	97.2222	94.3796	10.3671	4.23233
LV MPI IV	none	0.704846	1.09459	0.789474	0.967105	0.359813	0.783167	0.281169	0.125742		0.651934	1.12432	0.622222	1.11043	0.795181	0.695652	0.83329	0.227747	0.0929772
LV MPI NFT	none	0.704846	1.09459	0.789474	0.973684	0.359813	0.784482	0.282258	0.12623		0.662983	1.12432	0.627778	1.11043	0.795181	0.690821	0.835253	0.225598	0.0921001
MV Area	mm2	19.4118	22.6286	18.8571	21.4054	29.8065	22.4219	4.39818	1.96693		16.1633	16.5	20.3077	29.3333	19.4118	17.6	19.886	4.90315	2.0017
MV E/A	none	1.29459	1.37137	1.35126	1.26627	1.79551	1.4158	0.216431	0.0967911		1.03259	1.4918	1.33916	1.00876	1.06397	1.05059	1.16448	0.201181	0.0821318
AET	ms	50.4444	41.1111	47.5	42.2222	50.9524	46.446	4.57458	2.04582		50.2778	51.3889	50	45.2778	55.3333	57.5	51.6296	4.3143	1.7613
Heart Rate	BPM	488.532	514.903	493.109	501.007	507.046	500.919	10.5777	4.73047		421.429	411.84	469.52	489.131	475.487	442.433	451.64	31.2262	12.748
Diameter;s	mm	3.02129	2.76638	2.89299	3.47296	2.82039	2.9948	0.283856	0.126944		2.62117	1.80265	2.84454	2.90614	2.59945	2.66599	2.57332	0.397448	0.162258
Diameter;d	mm	4.17069	3.9838	4.31774	4.35159	4.35342	4.23545	0.159452	0.071309		3.79188	3.18188	4.011	3.70485	3.69036	3.84675	3.70445	0.28112	0.114767
Volume;s	ul	35.6294	28.7162	32.0231	49.9297	30.1073	35.2812	8.59045	3.84176		25.1158	9.75803	30.727	32.3816	24.6071	26.1837	24.7955	8.01151	3.27069
Volume;d	ul	77.3001	69.3328	83.8837	85.441	85.5259	80.2967	6.99751	3.12938		61.6947	40.401	70.4651	58.3169	57.7929	63.8036	58.7457	10.092	4.12004
Stroke Volume	ul	41.6708	40.6166	51.8606	35.5113	55.4186	45.0155	8.30584	3.71448		36.5789	30.643	39.7382	25.9353	33.1858	37.6198	33.9502	5.0919	2.07876
Ejection Fraction	%	53.9219	58.5851	61.8217	41.5569	64.7882	56.1348	9.09174	4.06595		59.2486	75.8496	56.3909	44.4732	57.3371	58.963	58.7104	10.0406	4.09906
Fractional Shortening	%	27.5627	30.5602	32.9966	20.1897	35.2116	29.3042	5.83555	2.60974		30.861	43.3474	29.0807	21.5585	29.5366	30.6954	30.8466	7.03415	2.87168
Cardiac Output	ml/min	20.3472	20.2704	25.5732	17.793	28.097	22.4162	4.25728	1.90391		15.3911	12.6092	18.6558	12.6856	15.8652	16.6445	15.3086	2.34401	0.956939
LV Mass	mg	131.641	139.734	200.209	167.692	181.051	164.065	28.5105	12.7503		138.942	145.764	223.909	218.577	238.613	224.696	198.417	43.9823	17.9557
LV Mass Cor	mg	105.313	111.787	160.167	134.153	144.841	131.252	22.8084	10.2002		111.153	116.611	179.127	174.862	190.89	179.757	158.733	35.1859	14.3646
LVAW;d	mm	1.05365	1.15104	1.25729	1.14219	1.05365	1.13156	0.0843241	0.0377109		1.00937	1.39896	1.26615	1.31042	1.46094	1.14143	1.26454	0.166741	0.0680718
LVAW;s	mm	1.33698	1.59375	1.64688	1.35469	1.66458	1.51938	0.160673	0.0718552		1.39896	1.7974	1.66458	1.63802	1.94792	1.49357	1.65674	0.199026	0.0812518
LVID;d	mm	4.18802	3.9401	4.22344	4.31198	4.35625	4.20396	0.162106	0.0724961		3.66562	3.17865	4.02865	3.65677	3.71875	3.87357	3.687	0.28717	0.117237
LVID;s	mm	3.03698	2.68281	2.91302	3.47969	2.83333	2.98917	0.302833	0.135431		2.58542	1.85052	2.8776	2.92188	2.59427	2.69571	2.58757	0.387522	0.158205
LVPW;d	mm	0.593229	0.708333	0.982812	0.788021	0.823438	0.779167	0.144135	0.0644593		1.02708	0.965104	1.23073	1.35469	1.31927	1.45714	1.22567	0.193051	0.0788128
LVPW;s	mm	0.894271	0.965104	1.40781	1.04479	1.38125	1.13865	0.239767	0.107227		1.38125	1.3901	1.51406	1.50521	1.50521	1.49357	1.4649	0.0617742	0.0252192
CO (LV Trace)	ml/min	20.3472	20.2704	25.5732	17.793	28.097	22.4162	4.25728	1.90391		15.3911	12.6092	18.6558	12.6856	15.8652	16.6445	15.3086	2.34401	0.956939
Diameter;d (LV Trace)	mm	4.17069	3.9838	4.31774	4.35159	4.35342	4.23545	0.159452	0.071309		3.79188	3.18188	4.011	3.70485	3.69036	3.84675	3.70445	0.28112	0.114767
Diameter;s (LV Trace)	mm	3.02129	2.76638	2.89299	3.47296	2.82039	2.9948	0.283856	0.126944		2.62117	1.80265	2.84454	2.90614	2.59945	2.66599	2.57332	0.397448	0.162258
EF	%	53.7942	60.6232	59.0952	40.0089	64.4793	55.6002	9.52149	4.25814		57.3104	74.1034	55.6086	41.9412	58.4046	58.5049	57.6455	10.228	4.17558
EF (LV Trace)	%	53.9219	58.5851	61.8217	41.5569	64.7882	56.1348	9.09174	4.06595		59.2486	75.8496	56.3909	44.4732	57.3371	58.963	58.7104	10.0406	4.09906
FS	%	27.4842	31.9101	31.0273	19.3019	34.9594	28.9365	6.00883	2.68723		29.4686	41.7827	28.5714	20.0969	30.2381	30.4075	30.0942	6.9195	2.82488
FS (LV Trace)	%	27.5627	30.5602	32.9966	20.1897	35.2116	29.3042	5.83555	2.60974		30.861	43.3474	29.0807	21.5585	29.5366	30.6954	30.8466	7.03415	2.87168
LV Mass (LV Trace)	mg	131.641	139.734	200.209	167.692	181.051	164.065	28.5105	12.7503		138.942	145.764	223.909	218.577	238.613	224.696	198.417	43.9823	17.9557
LV Mass AW	mg	131.835	140.988	205.013	171.695	167.979	163.502	28.81	12.8842		143.357	145.487	223.749	214.562	234.889	224.276	197.72	41.7887	17.0602
LV Mass AW (Corrected)	mg	105.468	112.79	164.011	137.356	134.384	130.802	23.048	10.3074		114.686	116.39	179	171.65	187.911	179.421	158.176	33.431	13.6481
LV Mass Corr (LV Trace)	mg	105.313	111.787	160.167	134.153	144.841	131.252	22.8084	10.2002		111.153	116.611	179.127	174.862	190.89	179.757	158.733	35.1859	14.3646
LV Vol;d	ul	78.0494	67.5343	79.6183	83.6137	85.6507	78.8933	7.03931	3.14808		56.8416	40.2991	71.196	56.5132	58.8337	64.8512	58.0892	10.3788	4.23711
LV Vol;s	ul	36.0633	26.5928	32.5677	50.1608	30.4237	35.1617	9.06074	4.05209		24.2655	10.4361	31.6049	32.8109	24.4721	26.91	25.0833	8.01458	3.27194
SV (LV Trace)	ul	41.6708	40.6166	51.8606	35.5113	55.4186	45.0155	8.30584	3.71448		36.5789	30.643	39.7382	25.9353	33.1858	37.6198	33.9502	5.0919	2.07876
V;d (LV Trace)	ul	77.3001	69.3328	83.8837	85.441	85.5259	80.2967	6.99751	3.12938		61.6947	40.401	70.4651	58.3169	57.7929	63.8036	58.7457	10.092	4.12004
V;s (LV Trace)	ul	35.6294	28.7162	32.0231	49.9297	30.1073	35.2812	8.59045	3.84176		25.1158	9.75803	30.727	32.3816	24.6071	26.1837	24.7955	8.01151	3.27069

## Sheet: Fig 6 a
Relative Force (%)								Relative Force (%)
WT								C84Y
pCa 8.0	pCa 6.5	pCa 6.2	pCa 5.8	pCa 5.6	pCa 5.4	pCa 4.0		pCa 8.0	pCa 6.5	pCa 6.2	pCa 5.8	pCa 5.6	pCa 5.4	pCa 4.0
0	1.0792	6.5244	26.8474	54.3373	65.1784	100		0	1.5045	4.0369	32.2211	64.2485	78.847	100
0	1.1407	2.9943	35.4087	50.2139	70.8413	100		0	1.6558	5.0773	54.3105	72.0046	79.3853	100
0	0.4748	1.3379	22.7881	44.9288	62.4658	100		0	1.3499	2.948	36.9899	59.488	72.211	100
0	0.7193	3.2041	9.6842	35.5784	64.9251	100		0	1.3771	4.1932	38.8593	68.3968	83.4742	100
0	0.4852	2.6016	18.7898	57.6849	75.8726	100		0	1.9163	9.1167	40.7302	60.8232	78.8978	100
0	3.2868	8.5661	21.9803	42.0296	63.0238	100

## Sheet: Fig 6 B
Force Normalized to WT (%)								Force Normalized to WT (%)
WT								C84Y
pCa 8.0	pCa 6.5	pCa 6.2	pCa 5.8	pCa 5.6	pCa 5.4	pCa 4.0		pCa 8.0	pCa 6.5	pCa 6.2	pCa 5.8	pCa 5.6	pCa 5.4	pCa 4.0
0	1.0792	6.5244	26.8474	54.3373	65.1784	100		0	1.3998	3.7701	30.0677	59.9581	73.5828	93.32
0	1.1407	2.9943	35.4087	50.2139	70.8413	100		0	1.5491	4.7407	50.6821	67.1904	74.0867	93.32
0	0.4748	1.3379	22.7881	44.9288	62.4658	100		0	1.2598	2.7529	34.5191	55.5161	67.3864	93.32
0	0.7193	3.2041	9.6842	35.5784	64.9251	100		0	1.2878	3.9101	36.2642	63.8309	77.8942	93.32
0	0.4852	2.6016	18.7898	57.6849	75.8726	100		0	1.7917	8.5108	38.0092	56.7572	73.6295	93.32
0	3.2868	8.5661	21.9803	42.0296	63.0238	100

[truncated: 12 more sheets: Fig 6 C-D, Fig 6 E, Fig 6 F, Suppl_Fig2 a-b, Suppl_Fig3 a-b, Suppl_Fig3 c, Suppl_Fig3 d-e, Suppl_Fig3 g , Supp_Fig3 h-s, Suppl_Fig4 b-c, Suppl_Fig4 h-i, Suppl. Fig. 11 B-I]
